# Supplementary material
Source: MDPI journal article supplement (https://www.mdpi.com/2073-4344/9/12/1008)
Supplement: s1 [file s1]

## Supplementary Material

# CO<sub>2</sub> methanation over hydrotalcite-derived nickel/ruthenium and supported ruthenium catalysts

Joana A. Martins <sup>1</sup>, A. Catarina Faria <sup>1</sup>, Miguel A. Soria <sup>1</sup>, Carlos V. Miguel <sup>1</sup>, Alírio E. Rodrigues <sup>2</sup> and Luis M. Madeira <sup>1,\*</sup>

<sup>1</sup> LEPABE, Chemical Engineering Department, Faculty of Engineering, University of Porto, Rua Dr. Roberto Frias s/n, 4200-465 Porto, Portugal

<sup>2</sup> LSRE-LCM, Chemical Engineering Department, Faculty of Engineering, University of Porto, Rua Dr. Roberto Frias s/n, 4200-465 Porto, Portugal

\* Correspondence: mmadeira@fe.up.pt; Tel.: +351 22 508 1519; Fax: +351 22 508 1449.

## Reduction temperature of Ru/Al<sub>2</sub>O<sub>3</sub><sup>com.</sup>

The catalyst Ru/Al<sub>2</sub>O<sub>3</sub><sup>com.</sup> was tested in the screening conditions after reduction at 300 °C and 600 °C. The CO<sub>2</sub> conversion and CH<sub>4</sub> selectivity obtained are presented in **Fig. S.1** and **Fig. S.2**, respectively.

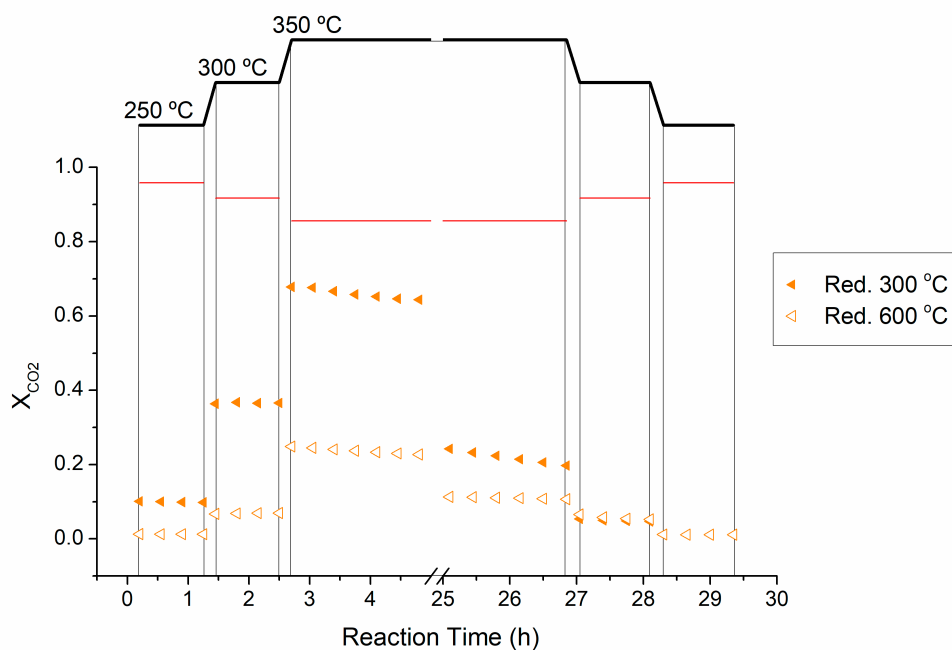

**Fig. S.1** - CO<sub>2</sub> conversion of Ru/Al<sub>2</sub>O<sub>3</sub> reduced at 300 °C and 600 °C, during the screening test. Red line shows the equilibrium conversion.

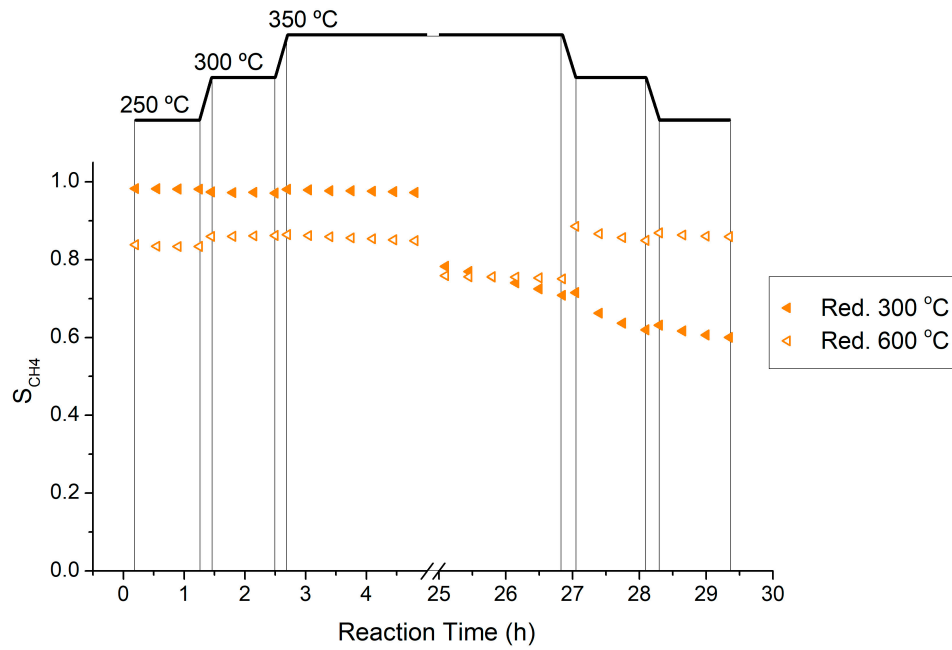

**Fig. S.2** – CH<sub>4</sub> selectivity of Ru/Al<sub>2</sub>O<sub>3</sub> reduced at 300 °C and 600 °C, during the screening test.

## Catalysts Price estimation

The price of the prepared catalysts was estimated using the CatCost tool [1]. The selected price estimation method was the simple step-based method (details can be found in [1]) that requires inputting to the CatCost tool both synthesis and business data. The former is data related to the catalyst composition, raw materials consumption, synthesis steps and other information that can be obtained from the laboratory-scale reaction. The latter is the annual demand, order frequency and order size. However, when using the simple step-based method only the order size is required, which was considered the same for all the catalysts (i.e. 1 ton). **Table S.1** summarizes the necessary inputs to the CatCost tool. **Table S.2** summarizes the outputs generated by the CatCost Tool, in U.S. dollars per kilogram.

**Table S.1** - Price estimation inputs required for the single-step method in the CatCost tool.

|                                             | Inputs |
|---------------------------------------------|--------|
| <b>Synthesis Campaign Size</b>              |        |
| <i>Order size (1-1000 tons)</i>             | 1 ton  |
| <b>Overhead and Selling Margin</b>          |        |
| <i>General &amp; administrative</i>         | 5 %    |
| <i>Sales, Admin, Research, Distribution</i> | 5 %    |

The hydrotalcite derived materials (prepared by coprecipitation with or without Ru impregnation) were estimated to be the most expensive to synthesize. Both the materials used and processing steps executed showed higher prices in these catalysts, than in the ruthenium in silica catalyst (prepared by impregnation). The impregnation of NiMgAl with ruthenium adds circa 35 \$/kg to the synthesis expenses.

The total price (including synthesis costs, overheads and selling margin) of Ru/NiMgAl, the most expensive catalyst, was estimated to be 1 023 \$/kg, followed by NiMgAl, 962.55 \$/kg and then Ru/SiO<sub>2</sub> (266.40 \$/kg).

**Table S.2** - Prices in U.S. dollars for producing 1 kg of catalyst calculated using the CatCost tool.

|                                             | Ru/NiMgAl       | NiMgAl        | Ru/SiO <sub>2</sub> |
|---------------------------------------------|-----------------|---------------|---------------------|
| <b>Synthesis</b>                            |                 |               |                     |
| <b>Costs</b>                                |                 |               |                     |
| <i>Raw material</i>                         | 561.27          | 529.82        | 140.86              |
| <i>Processing steps</i>                     | 15.62           | 12.53         | 9.25                |
| <b>Subtotal (\$/kg)</b>                     | <b>576.88</b>   | <b>542.36</b> | <b>150.10</b>       |
| <b>Overheads &amp; Margin</b>               |                 |               |                     |
| <i>General &amp; administrative</i>         | 28.84           | 27.12         | 7.51                |
| <i>Sales, Admin, Research, Distribution</i> | 30.29           | 28.47         | 7.88                |
| <i>Selling Margin</i>                       | 387.82          | 364.60        | 100.91              |
| <b>Total</b>                                |                 |               |                     |
| <b>Overheads &amp; Margin (\$/kg)</b>       | <b>446.95</b>   | <b>420.20</b> | <b>116.29</b>       |
| <b>Total Catalyst Price (\$/kg)</b>         | <b>1 023.83</b> | <b>962.55</b> | <b>266.40</b>       |

## References

- [1] F. G. Baddour, L. Snowden-Swan, J. D. Super and K. M. Van Allsburg, Estimating Precommercial Heterogeneous Catalyst Price: A Simple Step-Based Method, *Org. Process Res. Dev.*, vol. 22, pp. 1599–1605, 2018.
